# Supplementary material for: Genetics and Brain Transcriptomics of Completed Suicide
Source: Atypon-hosted journal article supplement (doi:10.1176/appi.ajp.2021.21030299), 2022-03-01
Supplement: appi.ajp.2021.21030299.ds001.pdf [file appi.ajp.2021.21030299.ds001.pdf]

 


Psychiatry Online
